# Supplementary material
Source: PubMed Central journal article supplement (PMC8459773)
Supplement: jb.00240-21-s0001.pdf [file jb.00240-21-s0001.pdf]

## Supplemental Information

### **RecA is required for the assembly of RecN into DNA repair complexes on the nucleoid**

Emma K. McLean<sup>†</sup>, Justin S. Lenhart<sup>†#</sup>, and Lyle A. Simmons<sup>\*</sup>

Department of Molecular, Cellular and Developmental Biology, University of Michigan, Ann Arbor, MI 48109, USA

<sup>†</sup> These authors contributed equally

<sup>#</sup> Present address: Agilent Technologies, Inc. 5301 Stevens Creek Blvd Santa Clara, CA 95051

<sup>\*</sup>To whom correspondence should be addressed: Department of Molecular, Cellular, and Developmental Biology, University of Michigan, Ann Arbor, Michigan 48109-1055, United States. Phone: (734) 647-2016, Fax: (734) 615-6337

E-mail: [lasimm@umich.edu](mailto:lasimm@umich.edu)

Running Title: Running title: RecA recruits RecN

Keywords: Double-strand break repair, end processing, RecA, RecN

**Table S1. Strains**

| Strain | Characteristics                                                                        | Source    |
|--------|----------------------------------------------------------------------------------------|-----------|
| PY79   | Prototroph SP $\beta^0$                                                                | (59)      |
| ERB78  | <i>recO::cat</i> (cm <sup>r</sup> )                                                    | (9)       |
| LAS40  | <i>recA-gfpmut2</i>                                                                    | (65)      |
| JSL327 | <i>recN::tet</i>                                                                       | This work |
| JSL486 | <i>recN-23-mgfpmut3</i> (cm <sup>r</sup> )                                             | This work |
| JSL513 | <i>mgfpmut3-22-recN</i> (cm <sup>r</sup> )                                             | This work |
| JSL537 | <i>recA::cat</i> (cm <sup>r</sup> )                                                    | This work |
| JSL539 | <i>recN::recN-23-mgfpmut3</i> (cm <sup>r</sup> ), <i>recA::spc</i> (spc <sup>r</sup> ) | This work |
| JSL552 | <i>recJ::erm</i>                                                                       | This work |
| JSL553 | <i>addA::erm</i>                                                                       | This work |
| JSL555 | <i>addB::erm</i>                                                                       | This work |
| JSL594 | $\Delta$ <i>recJ</i>                                                                   | This work |
| JSL569 | <i>recA::recA-gfpmut2</i> ; <i>addA::erm</i>                                           | This work |
| JSL600 | $\Delta$ <i>recJ</i> , <i>recA-gfpmut2</i> (spc <sup>r</sup> )                         | This work |
| JSL608 | <i>recN::erm</i>                                                                       | This work |
| JSL631 | <i>recA::recA-gfpmut2</i> , $\Delta$ <i>recJ</i> , <i>addA::erm</i>                    | This work |
| JSL612 | $\Delta$ <i>recJ</i> , <i>addA::erm</i>                                                | This work |
| EKM30  | <i>recN::recN-23-mgfpmut3</i> (cm <sup>r</sup> ); <i>addA::erm</i>                     | This work |
| EKM31  | <i>recN::recN-23-mgfpmut3</i> (cm <sup>r</sup> ); <i>addB::erm</i>                     | This work |

All strains are derivatives of PY79.

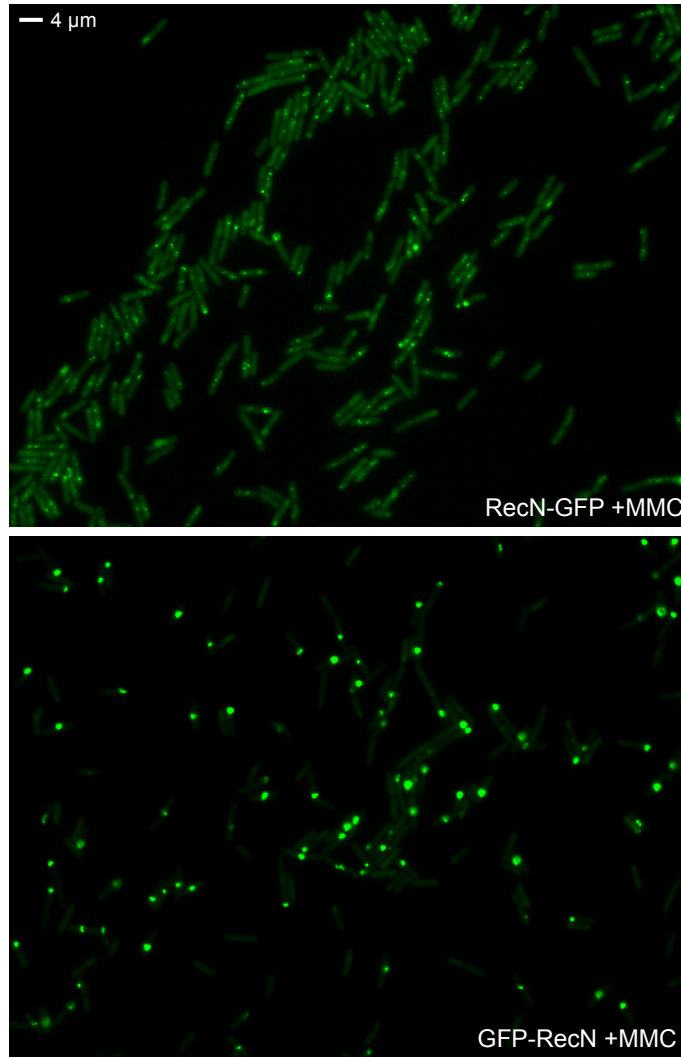

**Figure S1.** Representative images of cells expressing RecN-GFP or GFP-RecN following addition of MMC. Only the GFP channel is shown.

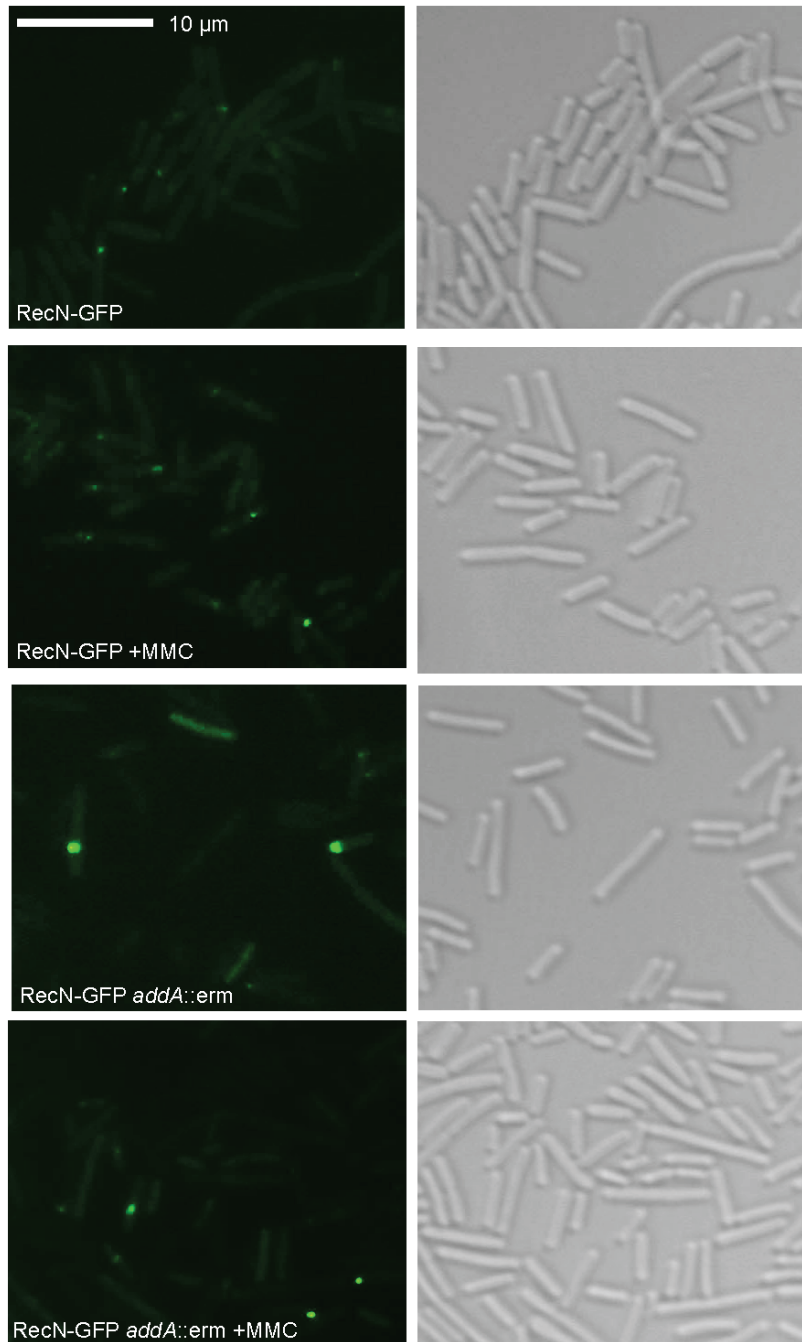

**Figure S2.** RecN-GFP forms large complexes near the cell periphery in cells lacking AddAB. The left column shows the GFP image and the right column shows the corresponding DIC image. The complexes that do form in the *addA::erm* background appear bright relative to the foci with AddAB intact.
